# Supplementary material
Source: PubMed Central journal article supplement (PMC4325177)
Supplement: AEM.03640-14_zam999116085so1.pdf [file AEM.03640-14_zam999116085so1.pdf]

## SUPPLEMENTARY DATA - Bosma *et al.*

Table S1. Growth, end product formation and genetic accessibility of selected isolates.

| Strain   | Identification <sup>1</sup>                                        | Isol. <sup>2</sup> | Sugars supporting growth <sup>3</sup> |                |                |                | Products (g/L) <sup>4</sup> |                      |                      |                      |                      |                      |                      |               |                      |                        | CFU <sup>5</sup> |
|----------|--------------------------------------------------------------------|--------------------|---------------------------------------|----------------|----------------|----------------|-----------------------------|----------------------|----------------------|----------------------|----------------------|----------------------|----------------------|---------------|----------------------|------------------------|------------------|
|          |                                                                    |                    | G                                     | S              | X              | A              | Lac                         | Ace                  | Suc                  | Mal                  | Eth                  | For                  | 2,3-BDO              | Prop          | Total                | OD <sub>600</sub>      |                  |
| ET 138   | <i>B. smithii</i>                                                  | 3                  | +                                     | +              | +              | +/-            | <b>6.74</b><br>±0.18        | <b>0.81</b><br>±0.02 | <b>0.07</b><br>±0.00 | nd                   | nd                   | nd                   | nd                   | nd            | <b>7.61</b><br>±0.16 | <b>1.425</b><br>±0.058 | 3                |
| DSM 1    | <i>B. coagulans</i>                                                | T                  | + <sup>7</sup>                        | - <sup>7</sup> | - <sup>7</sup> | - <sup>7</sup> | 6.37<br>±0.76               | 0.36<br>±0.05        | 0.13<br>±0.05        | 0.18<br>±0.30        | 0.04<br>±0.07        | nd                   | 0.10<br>±0.02        | nd            | 7.17<br>±1.16        | 1.467<br>±0.147        | 20 <sup>6</sup>  |
| ET 236   | <i>G. thermodenitrificans</i>                                      | 5                  | +/-                                   | +              | +              | +              | 5.37<br>±0.60               | 1.15<br>±0.07        | 0.13<br>±0.01        | 0.17<br>±0.11        | 0.04<br>±0.02        | 0.07<br>±0.04        | 0.05<br>±0.01        | nd            | 6.97<br>±0.85        | 0.833<br>±0.006        | 0                |
| ET 239   | 1: <i>A. pallidus</i><br>2: <i>B. coagulans</i>                    | 5                  | +/-                                   | +/-            | ++             | +/-            | 5.03<br>±0.22               | 0.87<br>±0.19        | 0.15<br>±0.04        | nd <sup>1</sup>      | 0.07<br>±0.00        | nd                   | 0.04<br>±0.03        | nd            | 6.68<br>±0.27        | 0.928<br>±0.041        | 1: 0<br>2: bg    |
| ET 224   | <i>B. coagulans</i>                                                | 5                  | +/-                                   | +/-            | +              | +/-            | 4.47<br>±0.12               | 0.72<br>±0.02        | 0.20<br>±0.00        | nd <sup>1</sup>      | nd                   | nd                   | 0.06<br>±0.01        | nd            | 6.20<br>±0.03        | 0.852<br>±0.011        | 0                |
| ET 251   | <i>G. thermodenitrificans</i>                                      | 5                  | +                                     | +/-            | +/-            | +/-            | <b>4.89</b><br>±0.03        | <b>0.85</b><br>±0.02 | <b>0.13</b><br>±0.00 | <b>0.11</b><br>±0.01 | <b>0.13</b><br>±0.02 | <b>0.00</b><br>±0.00 | <b>0.07</b><br>±0.01 | nd            | <b>6.18</b><br>±0.03 | <b>0.876</b><br>±0.002 | 4                |
| ET 131   | 1: <i>G. caldxylosilyticus</i><br>2: <i>G. thermodenitrificans</i> | 2                  | ++                                    | +/-            | ++             | +/-            | 4.71<br>±0.37               | 0.91<br>±0.00        | 0.14<br>±0.04        | 0.12<br>±0.02        | nd                   | 0.02<br>±0.01        | nd                   | nd            | 5.91<br>±0.39        | 0.538<br>±0.076        | 1/2: 0           |
| DSM 2542 | <i>G. thermoglucosidans</i>                                        | T                  | + <sup>8</sup>                        | + <sup>8</sup> | + <sup>8</sup> | - <sup>8</sup> | 4.39<br>±0.19               | 0.92<br>±0.03        | 0.21<br>±0.05        | 0.03<br>±0.02        | 0.09<br>±0.13        | 0.14<br>±0.15        | nd                   | 0.02<br>±0.01 | 5.81<br>±0.26        | 0.695<br>±0.195        | 2300             |
| ET 130   | <i>G. caldxylosilyticus</i>                                        | 2                  | ++                                    | ++             | +              | +/-            | 4.59<br>±0.37               | 0.76<br>±0.04        | 0.18<br>±0.01        | 0.08<br>±0.01        | nd                   | 0.04<br>±0.00        | nd                   | nd            | 5.64<br>±0.40        | 0.578<br>±0.048        | 1: bg<br>2: 0    |
| ET 186   | <i>G. thermodenitrificans</i>                                      | 4                  | +/-                                   | +              | +/-            | +/-            | 4.12<br>±0.39               | 0.92<br>±0.01        | 0.21<br>±0.07        | 0.07<br>±0.03        | nd                   | 0.02<br>±0.00        | 0.04<br>±0.06        | nd            | 5.37<br>±0.49        | 0.803<br>±0.168        | 0                |
| ET 144   | 1: <i>B. thermocopriae</i><br>2: <i>G. thermodenitrificans</i>     | 3                  | +/-                                   | +/-            | +              | +/-            | <b>3.63</b><br>±0.34        | <b>1.02</b><br>±0.03 | <b>0.15</b><br>±0.02 | <b>0.12</b><br>±0.10 | <b>0.21</b><br>±0.18 | <b>0.11</b><br>±0.02 | <b>0.08</b><br>±0.01 | nd            | <b>5.32</b><br>±0.06 | <b>0.817</b><br>±0.101 | 1: 0<br>2: 6     |
| ET 241   | <i>G. thermodenitrificans</i>                                      | 5                  | +/-                                   | +/-            | +              | +/-            | 3.99<br>±0.89               | 0.98<br>±0.07        | 0.16<br>±0.05        | 0.01<br>±0.01        | nd                   | 0.06<br>±0.05        | 0.03<br>±0.05        | nd            | 5.23<br>±1.00        | 0.662<br>±0.018        | 0                |
| ET 050   | <i>G. thermodenitrificans</i>                                      | 1                  | +/-                                   | +              | ++             | -              | 3.72<br>±0.49               | 1.01<br>±0.24        | 0.12<br>±0.02        | 0.09<br>±0.04        | nd                   | 0.02<br>±0.00        | 0.05<br>±0.07        | nd            | 5.00<br>±0.85        | 0.611<br>±0.125        | bg               |

|        |                                                                    |   |     |     |     |     |               |               |               |                 |               |               |               |               |               |                 |                 |
|--------|--------------------------------------------------------------------|---|-----|-----|-----|-----|---------------|---------------|---------------|-----------------|---------------|---------------|---------------|---------------|---------------|-----------------|-----------------|
| ET 208 | <i>G. caldxylosilyticus</i>                                        | 4 | +/- | +/- | -   | +/- | 3.14<br>±0.80 | 1.06<br>±0.14 | 0.57<br>±0.20 | 0.16<br>±0.03   | nd            | 0.04<br>±0.01 | nd            | nd            | 4.98<br>±1.18 | 0.881<br>±0.081 | bg              |
| ET 129 | 1: <i>G. caldxylosilyticus</i><br>2: <i>G. thermodenitrificans</i> | 2 | ++  | +++ | +   | -   | 3.56<br>±0.48 | 0.99<br>±0.06 | 0.16<br>±0.04 | 0.08<br>±0.02   | nd            | 0.02<br>±0.01 | nd            | nd            | 4.81<br>±0.36 | 0.579<br>±0.082 | 1: 0<br>2: bg   |
| ET 143 | <i>B. thermocopriae</i>                                            | 3 | +   | +   | +   | +/- | 2.81<br>±0.33 | 1.07<br>±0.17 | 0.15<br>±0.04 | nd              | 0.26<br>±0.15 | 0.20<br>±0.12 | 0.01<br>±0.01 | 0.09<br>±0.08 | 4.60<br>±0.90 | 0.719<br>±0.095 | res             |
| ET 072 | <i>G. thermodenitrificans</i>                                      | 2 | +   | +   | ++  | -   | 3.48<br>±0.41 | 0.81<br>±0.18 | 0.10<br>±0.01 | nd              | nd            | 0.01<br>±0.00 | 0.11<br>±0.15 | nd            | 4.52<br>±0.45 | 0.356<br>±0.020 | 1/2:<br>bg      |
| ET 157 | <i>G. thermodenitrificans</i>                                      | 3 | +   | +/- | +/- | -   | 3.45<br>±0.03 | 0.94<br>±0.06 | 0.07<br>±0.01 | nd              | nd            | 0.01<br>±0.00 | 0.03<br>±0.02 | nd            | 4.49<br>±0.03 | 0.553<br>±0.028 | 0               |
| ET 136 | <i>G. thermodenitrificans</i>                                      | 3 | +   | ++  | +   | +   | 2.46<br>±0.07 | 1.14<br>±0.01 | 0.16<br>±0.03 | nd              | 0.50<br>±0.42 | 0.16<br>±0.04 | nd            | 0.03<br>±0.02 | 4.45<br>±0.58 | 0.564<br>±0.090 | 0               |
| ET 244 | <i>B. thermocopriae</i>                                            | 5 | +   | +/- | +/- | +/- | 3.46<br>±0.38 | 0.36<br>±0.02 | 0.01<br>±0.00 | nd <sup>1</sup> | nd            | nd            | 0.04<br>±0.00 | 0.02<br>±0.00 | 3.89<br>±0.41 | 0.403<br>±0.054 | 0               |
| ET 226 | <i>B. thermocopriae</i>                                            | 5 | +/- | +/- | +++ | +/- | 3.41<br>±0.18 | 0.38<br>±0.01 | 0.02<br>±0.01 | nd              | nd            | nd            | 0.01<br>±0.01 | 0.02<br>±0.00 | 3.84<br>±0.21 | 0.663<br>±0.020 | 0               |
| ET 225 | <i>A. pallidus</i>                                                 | 5 | +/- | +/- | +   | +/- | 3.07<br>±0.87 | 0.63<br>±0.00 | 0.07<br>±0.03 | nd              | nd            | nd            | nd            | 0.03<br>±0.01 | 3.79<br>±0.89 | 0.558<br>±0.033 | bg              |
| ET 039 | <i>G. thermodenitrificans</i>                                      | 1 | +   | +   | +   | +   | 2.57<br>±0.08 | 0.92<br>±0.07 | 0.07<br>±0.03 | 0.04<br>±0.01   | nd            | 0.02<br>±0.00 | nd            | nd            | 3.62<br>±0.19 | 0.481<br>±0.010 | bg              |
| ET 261 | 1+2: <i>B. thermocopriae</i><br>3: <i>G. thermodenitrificans</i>   | 5 | +   | +/- | +   | +   | 1.96<br>±0.17 | 1.14<br>±0.10 | 0.06<br>±0.02 | nd              | 0.23<br>±0.01 | 0.20<br>±0.09 | nd            | 0.03<br>±0.00 | 3.62<br>±0.02 | 0.613<br>±0.014 | 1: bg<br>2/3: 0 |
| ET 145 | <i>G. thermodenitrificans</i>                                      | 3 | +   | +/- | +   | +/- | 1.91<br>±0.03 | 1.18<br>±0.09 | 0.11<br>±0.06 | nd              | 0.24<br>±0.05 | 0.10<br>±0.02 | 0.01<br>±0.01 | nd            | 3.54<br>±0.14 | 0.505<br>±0.029 | 0               |
| ET 200 | <i>G. thermodenitrificans</i>                                      | 4 | +   | +/- | +   | +/- | 2.65<br>±0.01 | 0.64<br>±0.25 | 0.16<br>±0.04 | 0.07<br>±0.05   | nd            | nd            | nd            | nd            | 3.53<br>±0.34 | 0.729<br>±0.055 | 0               |
| ET 036 | <i>G. thermodenitrificans</i>                                      | 1 | +   | +   | +   | +   | 2.50<br>±1.41 | 0.80<br>±0.31 | 0.08<br>±0.07 | 0.12<br>±0.11   | nd            | 0.02<br>±0.01 | nd            | nd            | 3.52<br>±1.69 | 0.456<br>±0.052 | bg              |
| ET 156 | <i>G. thermodenitrificans</i>                                      | 3 | ++  | ++  | +   | +/- | 2.34<br>±1.02 | 0.90<br>±0.20 | 0.16<br>±0.11 | 0.02<br>±0.02   | nd            | 0.01<br>±0.01 | 0.04<br>±0.05 | nd            | 3.46<br>±1.36 | 0.448<br>±0.083 | 0               |
| ET 042 | <i>G. thermodenitrificans</i>                                      | 1 | +   | +   | +   | +   | 2.36<br>±0.21 | 0.89<br>±0.07 | 0.03<br>±0.01 | 0.07<br>±0.03   | nd            | 0.02<br>±0.01 | nd            | nd            | 3.37<br>±0.27 | 0.627<br>±0.106 | 0               |

|        |                                    |   |     |     |     |     |                      |                      |                      |                      |                      |                      |    |                      |                      |                        |               |
|--------|------------------------------------|---|-----|-----|-----|-----|----------------------|----------------------|----------------------|----------------------|----------------------|----------------------|----|----------------------|----------------------|------------------------|---------------|
| ET 229 | <i>B. coagulans</i>                | 5 | +/- | +/- | +   | +/- | 2.83<br><i>±1.61</i> | 0.47<br><i>±0.03</i> | 0.03<br><i>±0.02</i> | nd                   | nd                   | nd                   | nd | 0.02<br><i>±0.00</i> | 3.35<br><i>±1.67</i> | 0.373<br><i>±0.045</i> | 0             |
| ET 267 | 1+2: <i>G. thermodenitrificans</i> | 5 | +   | +/- | +   | +/- | 2.19<br><i>±0.90</i> | 0.83<br><i>±0.00</i> | 0.05<br><i>±0.03</i> | 0.11<br><i>±0.15</i> | 0.03<br><i>±0.04</i> | 0.02<br><i>±0.00</i> | nd | nd                   | 3.22<br><i>±1.13</i> | 0.432<br><i>±0.048</i> | 1/2: 0        |
| ET 011 | 1+2: <i>G. thermodenitrificans</i> | 1 | +   | +   | +   | +   | 2.00<br><i>±0.91</i> | 0.79<br><i>±0.22</i> | 0.08<br><i>±0.03</i> | 0.08<br><i>±0.01</i> | 0.14<br><i>±0.20</i> | 0.02<br><i>±0.00</i> | nd | nd                   | 3.11<br><i>±1.35</i> | 0.539<br><i>±0.117</i> | 1: 0<br>2: bg |
| ET 081 | <i>G. thermodenitrificans</i>      | 2 | +   | +   | ++  | -   | 2.03<br><i>±0.20</i> | 0.93<br><i>±0.11</i> | 0.07<br><i>±0.00</i> | 0.06<br><i>±0.02</i> | nd                   | 0.01<br><i>±0.00</i> | nd | nd                   | 3.10<br><i>±0.08</i> | 0.740<br><i>±0.091</i> | bg            |
| ET 230 | 1+2: <i>B. coagulans</i>           | 5 | +/- | +/- | ++  | +++ | 2.34<br><i>±1.00</i> | 0.66<br><i>±0.00</i> | 0.04<br><i>±0.01</i> | nd                   | nd                   | nd                   | nd | 0.02<br><i>±0.00</i> | 3.06<br><i>±1.01</i> | 0.419<br><i>±0.072</i> | 1/2:<br>bg    |
| ET 263 | <i>B. thermocopriae</i>            | 5 | +   | +/- | +   | +/- | 1.72<br><i>±0.54</i> | 0.85<br><i>±0.16</i> | 0.03<br><i>±0.01</i> | nd                   | 0.24<br><i>±0.10</i> | 0.05<br><i>±0.00</i> | nd | nd                   | 2.89<br><i>±0.80</i> | 0.600<br><i>±0.098</i> | 0             |
| ET 159 | <i>G. thermodenitrificans</i>      | 4 | +/- | +/- | +/- | +/- | 0.74<br><i>±0.02</i> | 0.67<br><i>±0.06</i> | nd                   | nd                   | nd                   | 0.05<br><i>±0.01</i> | nd | 0.01<br><i>±0.00</i> | 1.46<br><i>±0.06</i> | 0.253<br><i>±0.001</i> | 0             |
| ET 160 | <i>G. thermodenitrificans</i>      | 4 | +/- | +/- | -   | +/- | 0.69<br><i>±0.03</i> | 0.53<br><i>±0.03</i> | nd                   | nd                   | nd                   | 0.04<br><i>±0.06</i> | nd | 0.00<br><i>±0.01</i> | 1.27<br><i>±0.11</i> | 0.315<br><i>±0.103</i> | bg            |

<sup>1</sup> The selection based on products was made prior to making pure cultures – the identification shown is that after making pure cultures; in cases where the pure culture was split in multiple species both are shown because in this selection round it was still a mixed culture. In the CFU-column, the identification for the subcultures is provided after the corresponding strain sub-number (e.g. 1, 2, or 3) as this was performed after making pure cultures.

<sup>2</sup> Isol: isolation condition (see Table 1).

<sup>3</sup> Sugars used in the selection step in the isolation procedure (see Table 1), prior to making pure cultures. Abbreviations: G: glucose; S: sucrose; X: xylose; A: arabinose; na: not applicable.

<sup>4</sup> Cultures were analyzed by HPLC after 48 h of growth at their isolation temperature (55 or 65°C) in 15 mL screw-capped tubes with 8 mL TMM + 0.5 g/L yeast extract + 10 g/L glucose + CaCO<sub>3</sub>. Transformable strains are shown in bold. Two genetically accessible *Bacillus* type strains known from literature for green chemical or fuel production were taken along as reference strains, e.g. *G. thermoglucosidans* DSM 2542<sup>T</sup> (1) and *B. coagulans* DSM 1<sup>T</sup> (2, 3). Data are the average of duplicates; standard deviations are indicated in italics after the ‘±’. nd = not detected; nd<sup>1</sup> = a very high malate peak with a large shoulder was observed, indicating the presence of another product besides or instead of malate but this was not further evaluated. Abbreviations: Lac: lactate; Ace: acetate; Suc: succinate; Mal: malate; Eth: ethanol; For: formate; 2,3-BDO: 2,3-butanediol; Prop: propionate.

<sup>5</sup> CFU = colony forming units per  $\mu\text{g}$  DNA after electrotransformation with pNW33n. Transformation was confirmed by isolating plasmid material and subsequent PCR and restriction analysis (Figure S1). Res = naturally resistant to chloramphenicol; nr = not reproducible, bg = background colonies after electroporation, also when no DNA was added, while these strains did not grow on chloramphenicol prior to transformation – colonies by these strains did not test positive in PCR. Results are shown for pure cultures, e.g. 239-1 and 239-2 are '1:0 2:bg' meaning 239-1 showed 0 colonies and 239-2 showed background colonies.

<sup>6</sup> As reported by (3).

<sup>7</sup> Acid production from these sugars as determined by (4).

<sup>8</sup> Acid production from these sugars as determined by (5).

**Table S2. Optimization of electrotransformation for *B. smithii* ET 138.**

| Nr | Parameter changed        | Buffer <sup>1</sup> | Final OD <sup>2</sup> | Hrs of growth <sup>3</sup> | kV  | μF | Ω   | μg DNA | Cuvette mm | Rec. medium <sup>4</sup> | Cm rec <sup>5</sup> | CFU fresh <sup>6</sup> | CFU -80 <sup>6</sup> |
|----|--------------------------|---------------------|-----------------------|----------------------------|-----|----|-----|--------|------------|--------------------------|---------------------|------------------------|----------------------|
| 1  | Cm rec+sett.             | SG-5                | 0.483                 | 1.75                       | 1.5 | 25 | 600 | 1      | 1          | RG                       | N                   | 3                      | nd                   |
| 2  | Cm rec+sett.             | SG-5                | 0.500                 | 1.5                        | 1.5 | 25 | 600 | 1      | 1          | RG                       | Y                   | 8                      | nd                   |
| 3  | Cm rec+sett.             | SG-5                | 0.483                 | 1.75                       | 2.0 | 25 | 200 | 1      | 2          | RG                       | N                   | 33                     | nd                   |
| 4  | Cm rec+sett.             | SG-5                | 0.500                 | 1.5                        | 2.0 | 25 | 200 | 5      | 2          | RG                       | Y                   | 3                      | nd                   |
| 5  | Settings                 | SG-5                | 0.424                 | 2.9                        | 2.0 | 25 | 200 | 1      | 2          | RG                       | N                   | 12                     | nd                   |
| 6  | Settings                 | SG-5                | 0.424                 | 2.9                        | 1.5 | 25 | 200 | 0.7    | 1          | RG                       | N                   | nd                     | 113                  |
| 7  | Settings                 | SG-5                | 0.424                 | 2.9                        | 2.0 | 25 | 200 | 0.7    | 2          | RG                       | N                   | nd                     | 7                    |
| 8  | Settings                 | SG-5                | 0.424                 | 2.9                        | 2.0 | 25 | 400 | 0.7    | 2          | RG                       | N                   | nd                     | 157                  |
| 9  | OD                       | SG-5                | 0.452                 | 1.4                        | 2.0 | 25 | 400 | 1      | 2          | RG                       | N                   | 70                     | nd                   |
| 10 | OD                       | SG-5                | 0.678                 | 1.4                        | 2.0 | 25 | 400 | 1      | 2          | RG                       | N                   | 11                     | nd                   |
| 11 | Rec. medium              | SG-5                | 0.574                 | 2.1                        | 2.0 | 25 | 400 | 1      | 2          | LB2                      | N                   | 712                    | 1149                 |
| 12 | Rec. medium              | SG-5                | 0.574                 | 2.1                        | 2.0 | 25 | 400 | 1      | 2          | RG                       | N                   | 0                      | nd                   |
| 13 | Rec. medium              | SG-5                | 0.514                 | 2.1                        | 2.0 | 25 | 400 | 1      | 2          | LB2                      | N                   | 406                    | 443                  |
| 14 | Rec. medium              | SG-5                | 0.514                 | 2.1                        | 2.0 | 25 | 400 | 1      | 2          | RG                       | N                   | 1                      | nd                   |
| 15 | Glycerol, rec.           | SG-10               | 0.446                 | 2.5                        | 2.0 | 25 | 400 | 1      | 2          | LB2                      | N                   | 796                    | 476                  |
| 16 | Glycerol, rec.           | SG-10               | 0.446                 | 2.5                        | 2.0 | 25 | 400 | 1      | 2          | RG                       | N                   | 36                     | nd                   |
| 17 | Rec. medium              | SG-5                | 0.522                 | 2.1                        | 2.0 | 25 | 400 | 1      | 2          | LB2                      | N                   | 590                    | nd                   |
| 18 | Rec. medium              | SG-5                | 0.522                 | 2.1                        | 2.0 | 25 | 400 | 1      | 2          | RG                       | N                   | 0                      | nd                   |
| 19 | Rec. medium              | SG-5                | 0.519                 | 1.75                       | 2.0 | 25 | 400 | 1      | 2          | LB2                      | N                   | 960                    | nd                   |
| 20 | Rec. medium              | SG-5                | 0.519                 | 1.75                       | 2.0 | 25 | 400 | 1      | 2          | RG                       | N                   | 5                      | nd                   |
| 21 | Buffer                   | SM-10               | 0.454                 | 2.5                        | 2.0 | 25 | 400 | 1      | 2          | LB2                      | N                   | 40                     | 0                    |
| 22 | Buffer                   | SM-10               | 0.454                 | 2.5                        | 2.0 | 25 | 400 | 1      | 2          | RG                       | N                   | 0                      | nd                   |
| 23 | Fast growth <sup>7</sup> | SG-5                | 0.539                 | 1                          | 2.0 | 25 | 400 | 2.5    | 2          | LB2                      | N                   | 1900                   | nd                   |
| 24 | Fast growth <sup>7</sup> | SG-5                | 0.512                 | 1.25                       | 2.0 | 25 | 400 | 1      | 2          | LB2                      | N                   | nd                     | 1122                 |
| 25 | μg DNA <sup>7</sup>      | SG-5                | 0.617                 | 1.3                        | 2.0 | 25 | 400 | 0.2    | 2          | LB2                      | N                   | 2409                   | nd                   |
| 26 | μg DNA <sup>7</sup>      | SG-5                | 0.617                 | 1.3                        | 2.0 | 25 | 400 | 0.02   | 2          | LB2                      | N                   | 5118                   | nd                   |

Lines indicate different experiments. Nr. 1 is the original protocol as described by Rhee *et al.*(6). Nr.3 are settings based on based on (7), which are the settings as used for screening of *Geobacillus* strains.

<sup>1</sup> 5 or 10 indicates the % of glycerol. SG = sucrose glycerol buffer from *Bacillus* protocol (6); SM = sorbitol mannitol buffer from *Geobacillus* protocol (8).

<sup>2</sup> Final OD<sub>600</sub> after the indicated number of hours (<sup>3</sup>) when growing cells prior to making them competent.

<sup>3</sup> Number of hours cells had grown before making them competent.

<sup>4</sup> RG is LB with 121 g/L sucrose and 10 g/L glucose (6).

<sup>5</sup> Whether or not 1/1000 diluted chloramphenicol was added after 2h of recovery. Y = yes; N = no.

<sup>6</sup> CFU: colony forming units per  $\mu\text{g}$  DNA. Cells were either electroporated directly after making them competent ('fresh') or after storage in  $-80^{\circ}\text{C}$  ('-80'). nd = not determined.

<sup>7</sup> In these experiments, after overnight growth, cells were transferred to 500 mL Erlenmeyer flasks or 1 L bottles (having a similar bottom surface) instead of to a 250 mL Erlenmeyer to allow for more aeration.

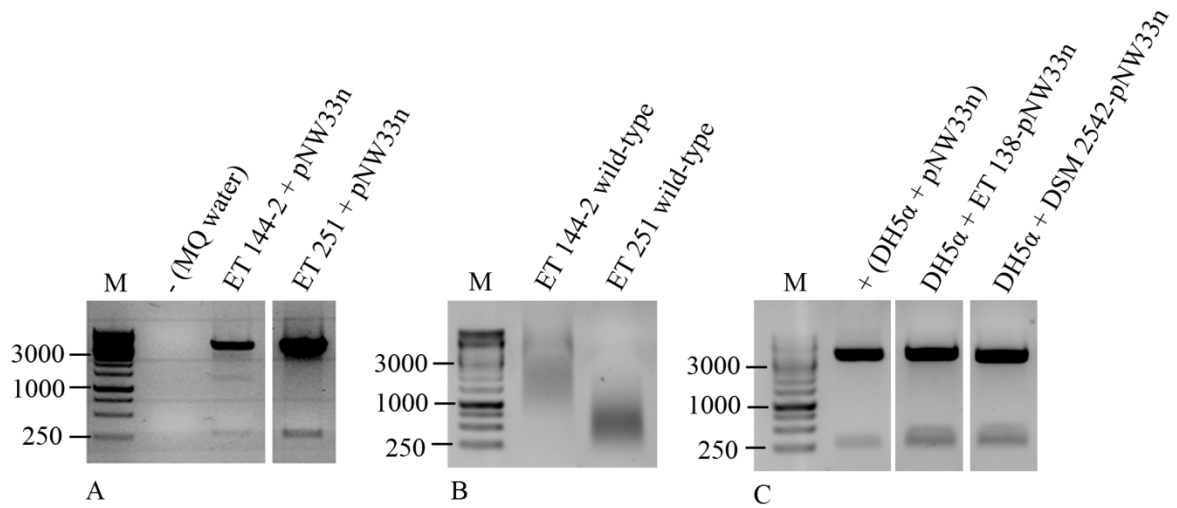

**Figure S1. Restriction analysis of plasmid DNA extracted from isolates and control strain transformed with pNW33n.** Restriction was performed with *Stu*I and *Hind*III; pNW33n digested with *Stu*I and *Hind*III yields bands of 282 and 3955 bp. M: Fermentas 1 kb DNA ladder. For each digestion reaction, 550-650 ng isolated plasmid DNA was used. **A:** Plasmids isolated from *G. thermodenitrificans* strains ET 144-2 and ET 251 transformed with pNW33n. **B:** Plasmids isolated from *G. thermodenitrificans* strains ET 144-2 and ET 251 prior to transformation with pNW33n (negative control) **C:** Plasmids isolated from *E. coli* DH5 $\alpha$  transformed pNW33n (original source) and after retransformation with plasmids isolated from *B. smithii* ET 138 transformants and *G. thermoglucosidans* DSM 2542 transformants.

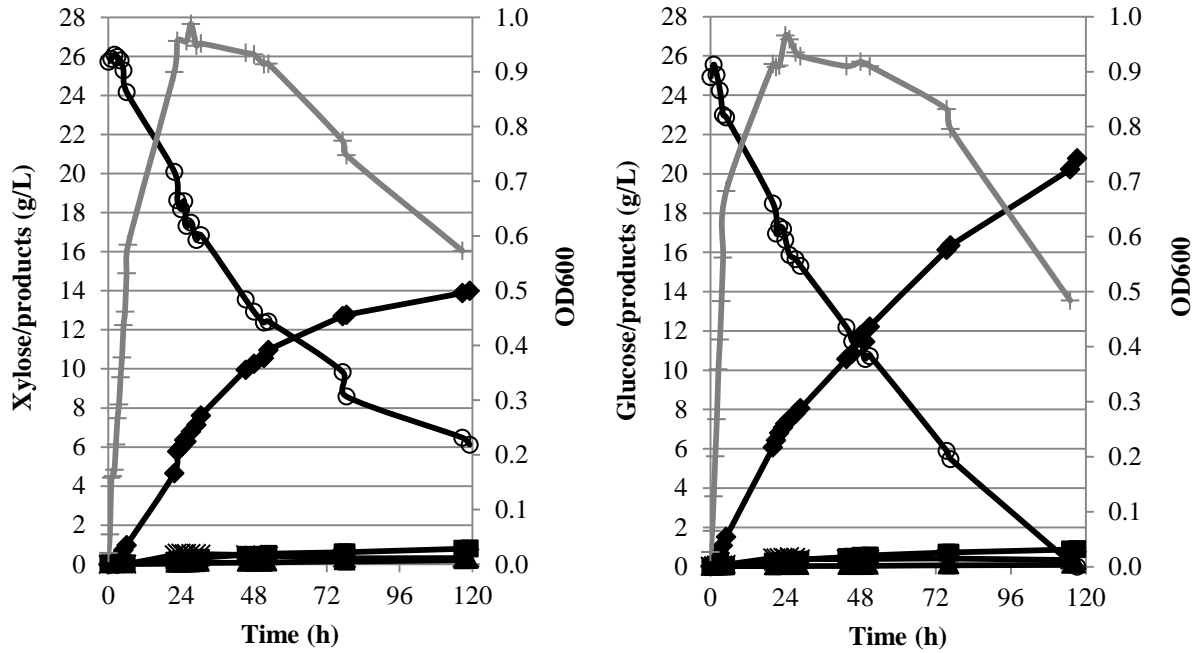

**Figure S2. Fermentation of *B. smithii* ET 138 on 25 g/L xylose and glucose.** Fermentation was carried out in 1 L TVMY supplemented with 25 g/L xylose or glucose, at 55°C, pH 6.5, 150 rpm and without any gas addition. Grey line with plus-sign: OD600; open circles: xylose or glucose; filled diamonds: lactate; closed squares: acetate; crosses: malate and succinate; closed triangles: pyruvate. During the xylose fermentation, severe browning of the medium was observed after approximately 70h.



## SUPPLEMENTARY REFERENCES

1. **Cripps RE, Eley K, Leak DJ, Rudd B, Taylor M, Todd M, Boakes S, Martin S, Atkinson T.** 2009. Metabolic engineering of *Geobacillus thermoglucosidasius* for high yield ethanol production. *Metab. Eng.* **11**:398-408.
2. **Kovacs AT, van Hartskamp M, Kuipers OP, van Kranenburg R.** 2010. Genetic tool development for a new host for biotechnology, the thermotolerant bacterium *Bacillus coagulans*. *Appl. Environ. Microbiol.* **76**:4085-4088.
3. **Van Kranenburg R, Van Hartskamp M, Heintz E, Anthonius J, Van Mullekom E, Snelders J.** 2007. WO Patent WO/2007/085,443. Genetic modification of homolactic thermophilic *Bacilli*.
4. **Jung MY, Kim J-S, Chang Y-H.** 2009. *Bacillus acidiproducens* sp. nov., vineyard soil isolates that produce lactic acid. *Int. J. Syst. Evol. Microbiol.* **59**:2226-2231.
5. **Suzuki Y, Kishigami T, Inoue K, Mizoguchi Y, Eto N, Takagi M, Abe S.** 1983. *Bacillus thermoglucosidasius* sp. nov., a new species of obligately thermophilic *Bacilli*. *Syst. Appl. Microbiol.* **4**:487-495.
6. **Rhee MS, Kim Jw, Qian Y, Ingram LO, Shanmugam KT.** 2007. Development of plasmid vector and electroporation condition for gene transfer in sporogenic lactic acid bacterium, *Bacillus coagulans*. *Plasmid* **58**:13-22.
7. **Narumi I, Sawakami K, Nakamoto S, Nakayama N, Yanagisawa T, Takahashi N, Kihara H.** 1992. A newly isolated *Bacillus stearothermophilus* K1041 and its transformation by electroporation. *Biotechnol. Tech.* **6**:83-86.
8. **Taylor MP, Esteban CD, Leak DJ.** 2008. Development of a versatile shuttle vector for gene expression in *Geobacillus* spp. *Plasmid* **60**:45-52.
